# Supplementary figures and images for: Adherent muscle connective tissue fibroblasts are phenotypically and biochemically equivalent to stromal fibro/adipogenic progenitors
Source: PubMed Central journal article supplement — Matrix Biol Plus. 2019 Apr 17;2:100006. doi: 10.1016/j.mbplus.2019.04.003 (PMC7852197; doi:10.1016/j.mbplus.2019.04.003), 2019-04-17

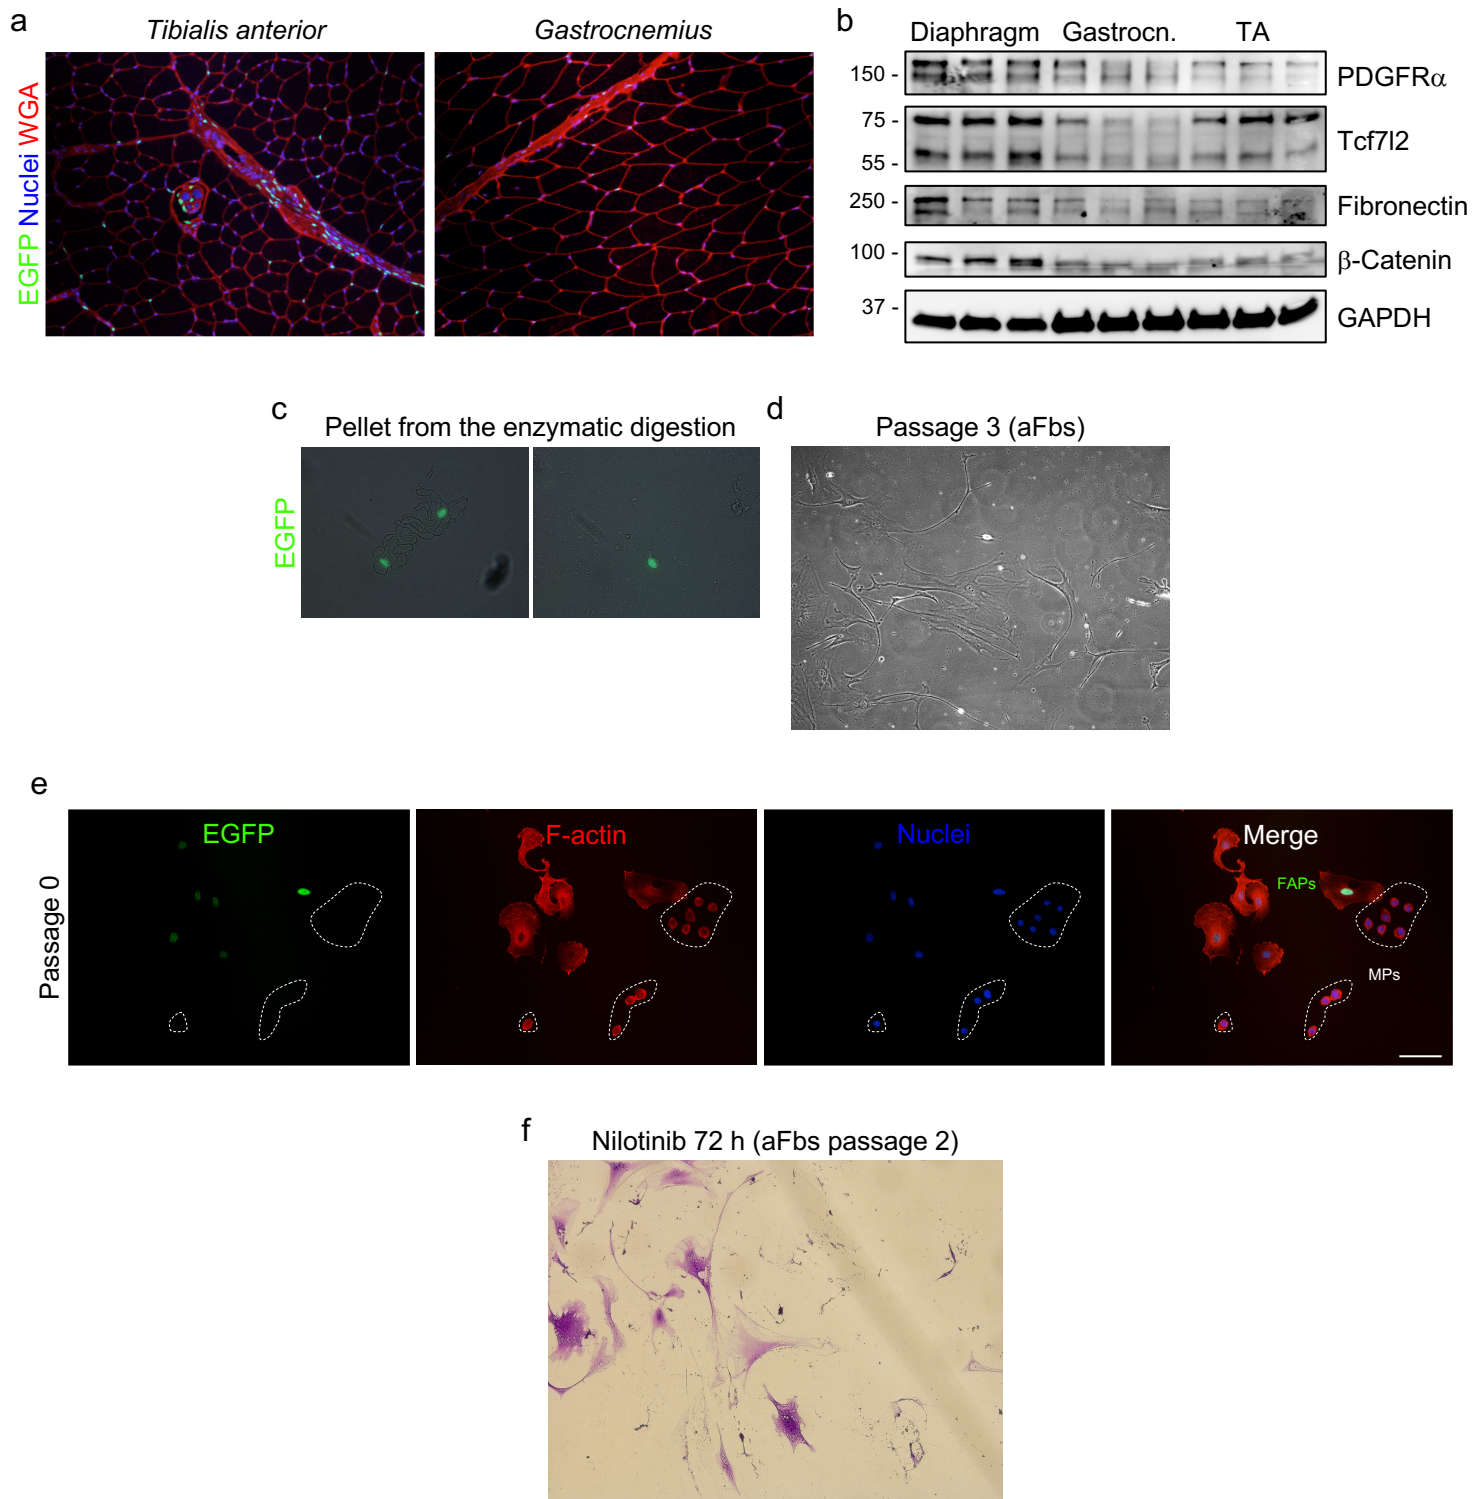

Suppl fig 1

Supplement: mmc1.pdf [file mmc1.pdf]
